# Supplementary material for: Restoration of Topoisomerase 2 Function by Complementation of Defective Monomers in Drosophila
Source: Oxford University Press journal article supplement (doi:10.1534/genetics.112.144006), 2012-08-26
Supplement: genetics.112.144006-1.pdf [file genetics.112.144006-1.pdf]

**Table S1 Primer sequences used for PCR amplification and genomic sequencing**

| Primer Name               | Sequence (5' to 3')          |
|---------------------------|------------------------------|
| Top2F + 1031 <sup>a</sup> | TAACTGGGTGGGTACTGTAGTCTTCTG  |
| Top2R + 1703              | AACGGTGAAGCTGGTGGAGAATATG    |
| Top2F + 1545              | TGACCATGCACAAGGAGCAGAAG      |
| Top2R + 2356              | ACCTGGAATGGCTTGATGTTGATGC    |
| Top2F + 2145              | TCCAACAGGTCTCGTTTGTCAACTC    |
| Top2R + 2924              | GCCATCCTGATCCTGATCTGTC       |
| Top2F + 2773              | TAATTTCAAGCAGCTTTCGGAGAATG   |
| Top2R + 3483              | AAGTGAACATCACCTTCCGCTGAC     |
| Top2F + 3362              | ATCACCTATGCAGACTTTATCAATCTGG |
| Top2R + 4061              | TTCACTGATTTCTAAACGGTTTCCG    |
| Top2F + 3959              | TACAAGAACTTTTTAGGACGCATGG    |
| Top2R + 4657              | TTCTTAGCCTTTGAGCTGACACTGG    |
| Top2F + 4534              | ATATCGTCCCGATCCCGTCAAG       |
| Top2R + 5222              | ATCAAATTCGTCCACCTCATCG       |
| Top2F + 5035              | ACCCGTCGAGTTTAAGATCACCGAAG   |
| Top2R + 5379              | CTGAAACACTTACCTTGGCCTTGCTG   |
| Top2F + 5157              | AACCGAAGGGCAAGCAGATTAAGC     |
| Top2R + 6249              | CCTTTATTTCCCACTTCCGATTTGTG   |

<sup>a</sup> Primers are relative to the transcription start site (+1).

**Table S2** Complementation tests to define *Top2* alleles  $y^1w^{67c23}$ ; *Top2<sup>m</sup>/CyO*,  $y^+ \times y^1w^{67c23}$ ; *Top2<sup>Df9043</sup>/CyO*,  $y^+$

| Allele Name  | 18°C                            | 25°C                              | 25°C                          |
|--------------|---------------------------------|-----------------------------------|-------------------------------|
|              | Maternally transmitted allele   | Maternally transmitted allele     | Paternally transmitted allele |
|              | % viability <sup>a</sup>        |                                   |                               |
| <i>Df17</i>  | ND                              | 0 <sup>a</sup> (604) <sup>b</sup> | 0 (196)                       |
| <i>Df35</i>  | ND                              | 0 (424)                           | 0 (695)                       |
| <b>17-1</b>  | <b>1 (710)</b> <sup>c</sup>     | <b>0 (359)</b>                    | <b>0 (412)</b>                |
| <b>17-2</b>  | <b>29 (906)</b> <sup>c, d</sup> | <b>0 (193)</b>                    | <b>0 (170)</b>                |
| <b>17-3</b>  | <b>0 (737)</b>                  | <b>0 (263)</b>                    | <b>0 (189)</b>                |
| <i>17-4</i>  | ND                              | 137 (249)                         | 110 (122)                     |
| <b>17-5</b>  | <b>0 (895)</b>                  | <b>0 (430)</b>                    | <b>0 (287)</b>                |
| <b>17-6</b>  | <b>0 (939)</b>                  | <b>0 (207)</b>                    | <b>0 (295)</b>                |
| <b>17-7</b>  | <b>0 (467)</b>                  | <b>0 (211)</b>                    | <b>0 (389)</b>                |
| <b>35-1</b>  | <b>0 (535)</b>                  | <b>0 (300)</b>                    | <b>0 (99)</b>                 |
| <b>35-2</b>  | <b>0 (874)</b>                  | <b>0 (289)</b>                    | <b>0 (104)</b>                |
| <b>35-3</b>  | <b>0 (898)</b>                  | <b>0 (283)</b>                    | <b>0 (102)</b>                |
| <i>35-4</i>  | ND                              | 25 (438)                          | 87 (453)                      |
| <b>35-5</b>  | <b>0 (803)</b>                  | <b>0 (423)</b>                    | <b>0 (815)</b>                |
| <b>35-6</b>  | <b>0 (631)</b>                  | <b>0 (120)</b>                    | <b>0 (160)</b>                |
| <i>35-7</i>  | ND                              | 127 (229)                         | 159 (208)                     |
| <i>35-8</i>  | ND                              | 118 (320)                         | 113 (238)                     |
| <i>35-9</i>  | ND                              | 205 (112)                         | 124 (302)                     |
| <b>35-12</b> | <b>0 (703)</b>                  | <b>0 (69)</b>                     | <b>0 (207)</b>                |
| <b>35-13</b> | <b>0 (611)</b>                  | <b>0 (115)</b>                    | <b>0 (218)</b>                |
| <b>35-14</b> | <b>0 (1065)</b>                 | <b>0 (226)</b>                    | <b>0 (162)</b>                |

<sup>a</sup> Percent viability is the # of  $Cy^+$  flies divided by half the # of  $Cy^-$  flies multiplied by 100.

<sup>b</sup> Total # of  $Cy^-$  flies scored.

<sup>c</sup> *Top2<sup>m</sup>/Top2<sup>Df9043</sup>* flies become stuck in food.

<sup>d</sup> *Top2<sup>17-2</sup>/Top2<sup>Df9043</sup>* males are sterile; females immediately become stuck in food.

ND: Not determined.

Bold indicates the fourteen lethal alleles at 25°C.

**Table S3** Numbers of progeny obtained from rescue crosses using the  $P[Top2-w^+]$  transgene  $y^1w^{67c23}$ ;  $Top2^{Df35}/CyO$ ;  $P[Top2-w^+]/+ \times y^1w^{67c23}/Y$ ;  $Top2^m/CyO, y^+$

| Allele transmitted by female |                           |                                     |                                                                   |                                    |
|------------------------------|---------------------------|-------------------------------------|-------------------------------------------------------------------|------------------------------------|
| Allele transmitted by male   | $Top2^m/Top2^{Df35}; +/+$ | $Top2^m/Top2^{Df35}; P[Top2-w^+]/+$ | $Top2^m \text{ or } Df35/CyO \text{ or } CyO, y^+; P[Top2-w^+]/+$ | % Viability <sup>a</sup>           |
| <i>Df17</i>                  | 0                         | 32                                  | 74                                                                | 86 <sup>a</sup> (146) <sup>b</sup> |
| <i>Df35</i>                  | 0                         | 26                                  | 82                                                                | 63 (161)                           |
| <i>17-1</i>                  | 0                         | 45                                  | 90                                                                | 100 (185)                          |
| <i>17-2</i>                  | 0                         | 67                                  | 101                                                               | 133 (213)                          |
| <i>17-3</i>                  | 0                         | 30                                  | 56                                                                | 107 (127)                          |
| <i>17-5</i>                  | 0                         | 72                                  | 130                                                               | 111 (256)                          |
| <i>17-6</i>                  | 0                         | 44                                  | 105                                                               | 84 (205)                           |
| <i>17-7</i>                  | 0                         | 79                                  | 130                                                               | 122 (269)                          |
| <i>35-1</i>                  | 0                         | 40                                  | 76                                                                | 105 (157)                          |
| <i>35-2</i>                  | 0                         | 53                                  | 76                                                                | 139 (129)                          |
| <i>35-3</i>                  | 0                         | 48                                  | 68                                                                | 141 (154)                          |
| <i>35-5</i>                  | 0                         | 37                                  | 64                                                                | 116 (131)                          |
| <i>35-6</i>                  | 0                         | 35                                  | 64                                                                | 109 (155)                          |
| <i>35-12</i>                 | 0                         | 38                                  | 69                                                                | 110 (124)                          |
| <i>35-13</i>                 | 0                         | 58                                  | 110                                                               | 105 (210)                          |
| <i>35-14</i>                 | 0                         | 78                                  | 127                                                               | 123 (280)                          |

<sup>a</sup>% viability is the # of  $Cy^+$ ,  $P[Top2-w^+]$  flies divided by half the # of  $Cy^-$ ,  $P[Top2, w^+]/+$  flies multiplied by 100.

<sup>b</sup>Total # of  $Cy^-$  flies scored.

Table S4 Percentage of male and female offspring of viable heteroallelic *Top2* genotypes

| Allele transmitted by male | Allele transmitted by female                 |                                                        |                         |                         |                         |                                             |
|----------------------------|----------------------------------------------|--------------------------------------------------------|-------------------------|-------------------------|-------------------------|---------------------------------------------|
|                            | 17-1 WHD                                     | 17-3 TOPRIM                                            | 17-6 TOPRIM             | 35-1 TOPRIM             | 35-5 ATPase             | 35-13 WHD                                   |
| 17-1 WHD                   | NA                                           | <b>F: 9</b><br><b>M: 91</b><br><b>(23)<sup>a</sup></b> | F: 42<br>M: 58<br>(24)  | F: 47<br>M: 53<br>(139) | F: 50<br>M: 50<br>(105) | NA                                          |
| 17-3 TOPRIM                | <b>F: 12</b><br><b>M: 88</b><br><b>(101)</b> | NA                                                     | F: 53<br>M: 47<br>(97)  | F: 57<br>M: 43<br>(70)  | F: 41<br>M: 59<br>(143) | <b>F: 30</b><br><b>M: 70</b><br><b>(69)</b> |
| 17-6 TOPRIM                | F: 60<br>M: 40<br>(30)                       | <b>F: 76</b><br><b>M: 24</b><br><b>(63)</b>            | NA                      | F: 48<br>M: 52<br>(190) | NA                      | <b>F: 27</b><br><b>M: 73</b><br><b>(79)</b> |
| 35-1 TOPRIM                | F: 44<br>M: 56<br>(108)                      | F: 59<br>M: 41<br>(74)                                 | F: 57<br>M: 43<br>(205) | NA                      | F: 51<br>M: 49<br>(92)  | F: 43<br>M: 57<br>(143)                     |
| 35-5 ATPase                | F: 51<br>M: 49<br>(94)                       | F: 45<br>M: 55<br>(145)                                | NA                      | F: 45<br>M: 55<br>(154) | NA                      | F: 38<br>M: 62<br>(125)                     |
| 35-13 WHD                  | NA                                           | F: 38<br>M: 62<br>(93)                                 | F: 47<br>M: 53<br>(73)  | F: 46<br>M: 54<br>(228) | F: 57<br>M: 43<br>(115) | NA                                          |

<sup>a</sup>Total number of homozygotes scored.

NA: Not applicable.

Bold: statistically significant ( $p < 0.05$ ).
