# Supplementary material for: Restoration of Topoisomerase 2 Function by Complementation of Defective Monomers in Drosophila
Source: Oxford University Press journal article supplement (doi:10.1534/genetics.112.144006), 2012-08-26
Supplement: genetics.112.144006-2.pdf [file genetics.112.144006-2.pdf]

**Table S2** Complementation tests to define *Top2* alleles  $y^1w^{67c23}$ ; *Top2<sup>m</sup>/CyO*,  $y^+ \times y^1w^{67c23}$ ; *Top2<sup>Df9043</sup>/CyO*,  $y^+$

| Allele Name  | 18°C                            | 25°C                              | 25°C                          |
|--------------|---------------------------------|-----------------------------------|-------------------------------|
|              | Maternally transmitted allele   | Maternally transmitted allele     | Paternally transmitted allele |
|              | % viability <sup>a</sup>        |                                   |                               |
| <i>Df17</i>  | ND                              | 0 <sup>a</sup> (604) <sup>b</sup> | 0 (196)                       |
| <i>Df35</i>  | ND                              | 0 (424)                           | 0 (695)                       |
| <b>17-1</b>  | <b>1 (710)</b> <sup>c</sup>     | <b>0 (359)</b>                    | <b>0 (412)</b>                |
| <b>17-2</b>  | <b>29 (906)</b> <sup>c, d</sup> | <b>0 (193)</b>                    | <b>0 (170)</b>                |
| <b>17-3</b>  | <b>0 (737)</b>                  | <b>0 (263)</b>                    | <b>0 (189)</b>                |
| <i>17-4</i>  | ND                              | 137 (249)                         | 110 (122)                     |
| <b>17-5</b>  | <b>0 (895)</b>                  | <b>0 (430)</b>                    | <b>0 (287)</b>                |
| <b>17-6</b>  | <b>0 (939)</b>                  | <b>0 (207)</b>                    | <b>0 (295)</b>                |
| <b>17-7</b>  | <b>0 (467)</b>                  | <b>0 (211)</b>                    | <b>0 (389)</b>                |
| <b>35-1</b>  | <b>0 (535)</b>                  | <b>0 (300)</b>                    | <b>0 (99)</b>                 |
| <b>35-2</b>  | <b>0 (874)</b>                  | <b>0 (289)</b>                    | <b>0 (104)</b>                |
| <b>35-3</b>  | <b>0 (898)</b>                  | <b>0 (283)</b>                    | <b>0 (102)</b>                |
| <i>35-4</i>  | ND                              | 25 (438)                          | 87 (453)                      |
| <b>35-5</b>  | <b>0 (803)</b>                  | <b>0 (423)</b>                    | <b>0 (815)</b>                |
| <b>35-6</b>  | <b>0 (631)</b>                  | <b>0 (120)</b>                    | <b>0 (160)</b>                |
| <i>35-7</i>  | ND                              | 127 (229)                         | 159 (208)                     |
| <i>35-8</i>  | ND                              | 118 (320)                         | 113 (238)                     |
| <i>35-9</i>  | ND                              | 205 (112)                         | 124 (302)                     |
| <b>35-12</b> | <b>0 (703)</b>                  | <b>0 (69)</b>                     | <b>0 (207)</b>                |
| <b>35-13</b> | <b>0 (611)</b>                  | <b>0 (115)</b>                    | <b>0 (218)</b>                |
| <b>35-14</b> | <b>0 (1065)</b>                 | <b>0 (226)</b>                    | <b>0 (162)</b>                |

<sup>a</sup> Percent viability is the # of  $Cy^+$  flies divided by half the # of  $Cy^-$  flies multiplied by 100.

<sup>b</sup> Total # of  $Cy^-$  flies scored.

<sup>c</sup> *Top2<sup>m</sup>/Top2<sup>Df9043</sup>* flies become stuck in food.

<sup>d</sup> *Top2<sup>17-2</sup>/Top2<sup>Df9043</sup>* males are sterile; females immediately become stuck in food.

ND: Not determined.

Bold indicates the fourteen lethal alleles at 25°C.
