# Supplementary material for: Restoration of Topoisomerase 2 Function by Complementation of Defective Monomers in Drosophila
Source: Oxford University Press journal article supplement (doi:10.1534/genetics.112.144006), 2012-08-26
Supplement: genetics.112.144006-3.pdf [file genetics.112.144006-3.pdf]

Table S4 Percentage of male and female offspring of viable heteroallelic *Top2* genotypes

| Allele transmitted by male | Allele transmitted by female                 |                                                        |                         |                         |                         |                                             |
|----------------------------|----------------------------------------------|--------------------------------------------------------|-------------------------|-------------------------|-------------------------|---------------------------------------------|
|                            | 17-1 WHD                                     | 17-3 TOPRIM                                            | 17-6 TOPRIM             | 35-1 TOPRIM             | 35-5 ATPase             | 35-13 WHD                                   |
| 17-1 WHD                   | NA                                           | <b>F: 9</b><br><b>M: 91</b><br><b>(23)<sup>a</sup></b> | F: 42<br>M: 58<br>(24)  | F: 47<br>M: 53<br>(139) | F: 50<br>M: 50<br>(105) | NA                                          |
| 17-3 TOPRIM                | <b>F: 12</b><br><b>M: 88</b><br><b>(101)</b> | NA                                                     | F: 53<br>M: 47<br>(97)  | F: 57<br>M: 43<br>(70)  | F: 41<br>M: 59<br>(143) | <b>F: 30</b><br><b>M: 70</b><br><b>(69)</b> |
| 17-6 TOPRIM                | F: 60<br>M: 40<br>(30)                       | <b>F: 76</b><br><b>M: 24</b><br><b>(63)</b>            | NA                      | F: 48<br>M: 52<br>(190) | NA                      | <b>F: 27</b><br><b>M: 73</b><br><b>(79)</b> |
| 35-1 TOPRIM                | F: 44<br>M: 56<br>(108)                      | F: 59<br>M: 41<br>(74)                                 | F: 57<br>M: 43<br>(205) | NA                      | F: 51<br>M: 49<br>(92)  | F: 43<br>M: 57<br>(143)                     |
| 35-5 ATPase                | F: 51<br>M: 49<br>(94)                       | F: 45<br>M: 55<br>(145)                                | NA                      | F: 45<br>M: 55<br>(154) | NA                      | F: 38<br>M: 62<br>(125)                     |
| 35-13 WHD                  | NA                                           | F: 38<br>M: 62<br>(93)                                 | F: 47<br>M: 53<br>(73)  | F: 46<br>M: 54<br>(228) | F: 57<br>M: 43<br>(115) | NA                                          |

<sup>a</sup>Total number of homozygotes scored.

NA: Not applicable.

Bold: statistically significant ( $p < 0.05$ ).
