# Supplementary material for: Restoration of Topoisomerase 2 Function by Complementation of Defective Monomers in Drosophila
Source: Oxford University Press journal article supplement (doi:10.1534/genetics.112.144006), 2012-08-26
Supplement: genetics.112.144006-4.pdf [file genetics.112.144006-4.pdf]

**Table S1 Primer sequences used for PCR amplification and genomic sequencing**

| Primer Name               | Sequence (5' to 3')          |
|---------------------------|------------------------------|
| Top2F + 1031 <sup>a</sup> | TAACTGGGTGGGTACTGTAGTCTTCTG  |
| Top2R + 1703              | AACGGTGAAGCTGGTGGAGAATATG    |
| Top2F + 1545              | TGACCATGCACAAGGAGCAGAAG      |
| Top2R + 2356              | ACCTGGAATGGCTTGATGTTGATGC    |
| Top2F + 2145              | TCCAACAGGTCTCGTTTGTCAACTC    |
| Top2R + 2924              | GCCATCCTGATCCTGATCTGTC       |
| Top2F + 2773              | TAATTTCAAGCAGCTTTCGGAGAATG   |
| Top2R + 3483              | AAGTGAACATCACCTTCCGCTGAC     |
| Top2F + 3362              | ATCACCTATGCAGACTTTATCAATCTGG |
| Top2R + 4061              | TTCACTGATTTCTAAACGGTTTCCG    |
| Top2F + 3959              | TACAAGAACTTTTTAGGACGCATGG    |
| Top2R + 4657              | TTCTTAGCCTTTGAGCTGACACTGG    |
| Top2F + 4534              | ATATCGTCCCGATCCCGTCAAG       |
| Top2R + 5222              | ATCAAATTCGTCCACCTCATCG       |
| Top2F + 5035              | ACCCGTCGAGTTTAAGATCACCGAAG   |
| Top2R + 5379              | CTGAAACACTTACCTTGGCCTTGCTG   |
| Top2F + 5157              | AACCGAAGGGCAAGCAGATTAAGC     |
| Top2R + 6249              | CCTTTATTTCCCACTTCCGATTTGTG   |

<sup>a</sup> Primers are relative to the transcription start site (+1).
