# Supplementary material for: Restoration of Topoisomerase 2 Function by Complementation of Defective Monomers in Drosophila
Source: Oxford University Press journal article supplement (doi:10.1534/genetics.112.144006), 2012-08-26
Supplement: genetics.112.144006-5.pdf [file genetics.112.144006-5.pdf]

**Table S3** Numbers of progeny obtained from rescue crosses using the  $P[Top2-w^+]$  transgene  $y^1w^{67c23}$ ;  $Top2^{Df35}/CyO$ ;  $P[Top2-w^+]/+ \times y^1w^{67c23}/Y$ ;  $Top2^m/CyO, y^+$

| Allele transmitted by female |                           |                                     |                                                                   |                                    |
|------------------------------|---------------------------|-------------------------------------|-------------------------------------------------------------------|------------------------------------|
| Allele transmitted by male   | $Top2^m/Top2^{Df35}; +/+$ | $Top2^m/Top2^{Df35}; P[Top2-w^+]/+$ | $Top2^m \text{ or } Df35/CyO \text{ or } CyO, y^+; P[Top2-w^+]/+$ | % Viability <sup>a</sup>           |
| <i>Df17</i>                  | 0                         | 32                                  | 74                                                                | 86 <sup>a</sup> (146) <sup>b</sup> |
| <i>Df35</i>                  | 0                         | 26                                  | 82                                                                | 63 (161)                           |
| <i>17-1</i>                  | 0                         | 45                                  | 90                                                                | 100 (185)                          |
| <i>17-2</i>                  | 0                         | 67                                  | 101                                                               | 133 (213)                          |
| <i>17-3</i>                  | 0                         | 30                                  | 56                                                                | 107 (127)                          |
| <i>17-5</i>                  | 0                         | 72                                  | 130                                                               | 111 (256)                          |
| <i>17-6</i>                  | 0                         | 44                                  | 105                                                               | 84 (205)                           |
| <i>17-7</i>                  | 0                         | 79                                  | 130                                                               | 122 (269)                          |
| <i>35-1</i>                  | 0                         | 40                                  | 76                                                                | 105 (157)                          |
| <i>35-2</i>                  | 0                         | 53                                  | 76                                                                | 139 (129)                          |
| <i>35-3</i>                  | 0                         | 48                                  | 68                                                                | 141 (154)                          |
| <i>35-5</i>                  | 0                         | 37                                  | 64                                                                | 116 (131)                          |
| <i>35-6</i>                  | 0                         | 35                                  | 64                                                                | 109 (155)                          |
| <i>35-12</i>                 | 0                         | 38                                  | 69                                                                | 110 (124)                          |
| <i>35-13</i>                 | 0                         | 58                                  | 110                                                               | 105 (210)                          |
| <i>35-14</i>                 | 0                         | 78                                  | 127                                                               | 123 (280)                          |

<sup>a</sup>% viability is the # of  $Cy^+$ ,  $P[Top2-w^+]$  flies divided by half the # of  $Cy^-$ ,  $P[Top2, w^+]/+$  flies multiplied by 100.

<sup>b</sup>Total # of  $Cy^-$  flies scored.
